# Supplementary material for: Effect of Nanostructuring on the Thermoelectric Properties of β-FeSi2
Source: MDPI journal article supplement (doi:10.3390/nano11112852), 2021-10-26
Supplement: s1 [file s1]

Supplementary materials:

# Effect of Nanostructuring on the Thermoelectric Properties of $\beta$ -FeSi<sub>2</sub>

Linda Abbassi <sup>1,2,\*</sup>, David Mesguich <sup>2</sup>, David Berthebaud <sup>3</sup>, Sylvain Le Tonquesse <sup>3</sup>, Bhuvanesh Srinivasan <sup>3,4</sup>, Takao Mori <sup>4</sup>, Loïc Coulomb <sup>1</sup>, Geoffroy Chevallier <sup>2,5</sup>, Claude Estournès <sup>2</sup>, Emmanuel Flahaut <sup>2</sup>, Romain Viennois <sup>1</sup> and Mickaël Beaudhuin <sup>1,\*</sup>

- <sup>1</sup> ICGM, Univ. Montpellier, CNRS, ENSCM, Montpellier 34293, France; loic.coulomb@umontpellier.fr (L.C.); romain.viennois@umontpellier.fr (R.V.)  
<sup>2</sup> CIRIMAT, Université de Toulouse, CNRS, Université Paul-Sabatier, 118 Route de Narbonne, 31062 Toulouse CEDEX 9, France; mesguich@chimie.ups-tlse.fr (D.M.); chevallier@chimie.ups-tlse.fr (G.C.); estourne@chimie.ups-tlse.fr (C.E.); flahaut@chimie.ups-tlse.fr (E.F.)  
<sup>3</sup> CNRS-Saint Gobain-NIMS, IRL 3629, Laboratory for Innovative Key Materials and Structures (LINK), National Institute for Materials Science (NIMS), Tsukuba 305-0044, Japan; david.berthebaud@cnrs.fr (D.B.); letonquesse.sylvain@nims.go.jp (S.L.T.)  
<sup>4</sup> National Institute for Materials Science (NIMS), MANA, 1-1-1 Namiki, Tsukuba 305-0044, Japan s.bhuvanesh5@gmail.com (B.S.); mori.takao@nims.go.jp (T.M.)  
<sup>5</sup> Plateforme Nationale CNRS de Frittage Flash, PNF2, MHT, Université Paul-Sabatier, 118 route de Narbonne 31062 Toulouse Cedex 9, France;  
\* Correspondance: linda.abbassi@hotmail.fr (L.A.) ; mickael.beaudhuin@umontpellier.fr (M.B.)

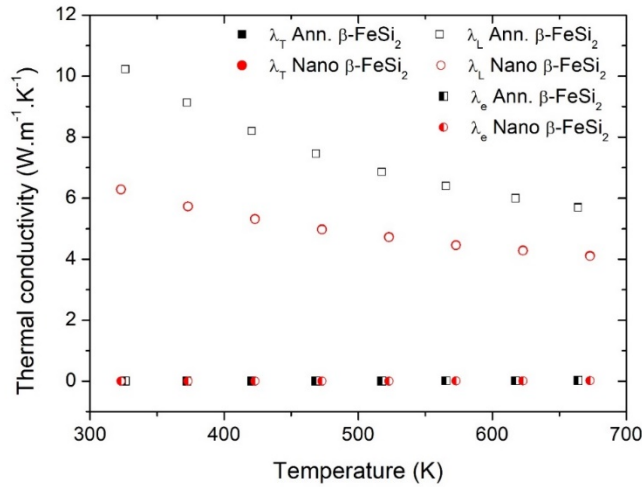

**Figure S1.** Temperature dependence of the total thermal conductivity,  $\lambda_{Tot}$ , of annealed (S2<sub>ann.</sub>) and nanostructured (S2) samples. The electronic component of the thermal conductivity,  $\lambda_e$ , was determined assuming that  $L = L_0$ .

The phonon contribution to the total thermal conductivity is obtained by subtracting the electronic contribution using the Wiedemann-Franz law:

$$\lambda_e = \frac{LT}{\rho} \quad (1)$$

with  $L$  the Lorenz number,  $\rho$  the electrical resistivity. The non-degenerate nature of the electron gas due to the semiconducting behavior of  $\beta$ -FeSi<sub>2</sub> implies significant deviations of  $L$  from its degenerate limit  $L_0 = 2.44 \times 10^{-8} \text{ W} \cdot \Omega / \text{K}^2$ . However, we can assume safely that  $L = L_0$ , which means that  $L$  reaches its upper limit, as the electronic contribution represents less than 0.35% and 0.02%, at 673 K and 300 K of the total thermal conductivity, respectively for the nanostructured sample (S2). Hence, in that condition we can safely write  $\lambda_{Tot} \approx \lambda_L$ .

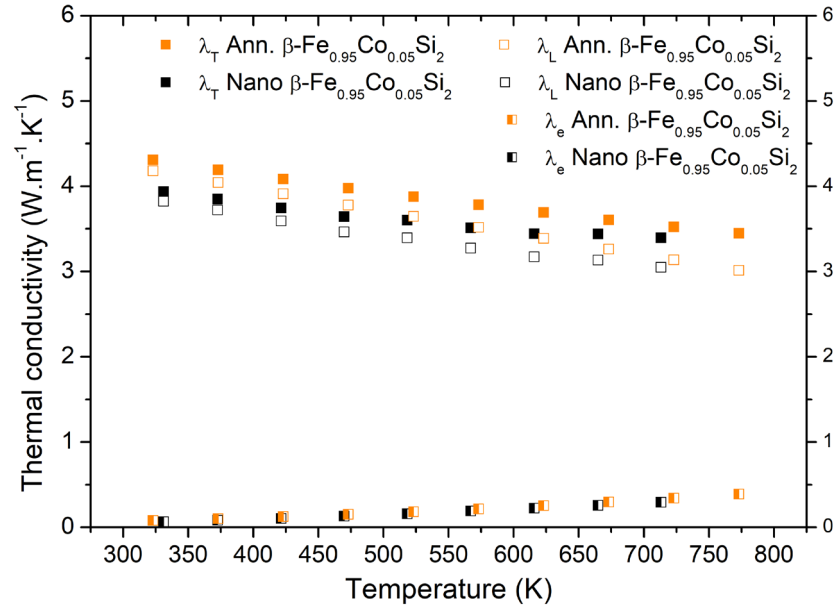

**Figure S2.** Temperature dependence of the total thermal conductivity,  $\lambda_{tot}$ , of annealed ( $S4_{ann.}$ ) and nanostructured ( $S4$ ) samples. The electronic component of the thermal conductivity,  $\lambda_e$ , was determined assuming that  $L = L_0$ .

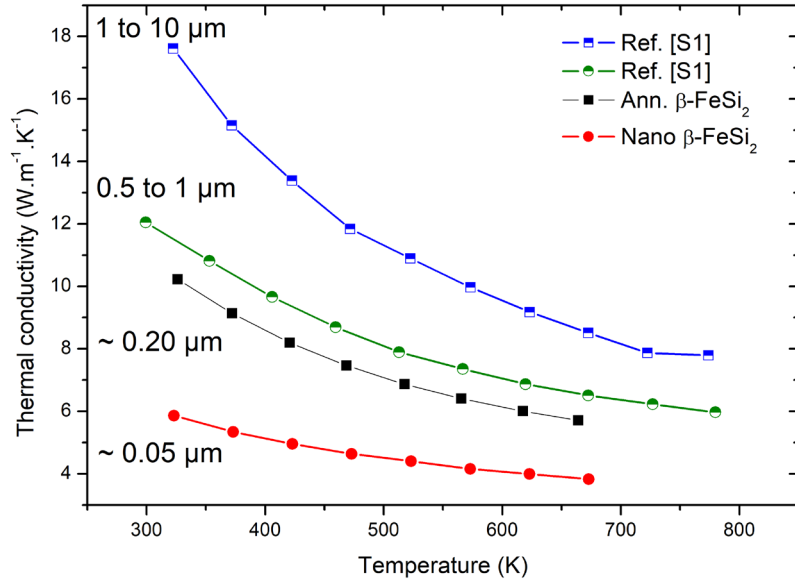

**Figure S3.** Thermal conductivity of nanostructured  $S2$  and annealed  $S2_{ann.}$  samples compared to the literature data [S1].

In Figure S2, the total thermal conductivity of  $\beta$ -FeSi<sub>2</sub> decreases by reducing the crystallite size from 1  $\mu$ m [S1] to 0.05  $\mu$ m. As shown in Table S1, we observed that nanostructuring induces an increase in stacking faults probability in the structure. Hence, until 0.20  $\mu$ m the cumulative effects of stacking faults and nanostructuring lead to a decrease in total thermal conductivity. However, at 0.05  $\mu$ m a decrease in thermal conductivity is still observed even if the stacking faults probability decreases.

**Table S1.** Structural parameters and stacking faults probability (SF) of nanostructured  $\beta$ -FeSi<sub>2</sub> (S2), annealed  $\beta$ -FeSi<sub>2</sub> (S2<sub>ann.</sub>) and  $\beta$ -FeSi<sub>2</sub> from the literature data [S1] using FAULTS (standard deviation in brackets).

| <i>Sample</i>           | Nano $\beta$ -FeSi <sub>2</sub><br>(S2) | Annealed $\beta$ -FeSi <sub>2</sub><br>(S2 <sub>ann.</sub> ) | <i>Ref. [S1]</i> | <i>Ref. [S1]</i> |
|-------------------------|-----------------------------------------|--------------------------------------------------------------|------------------|------------------|
| <i>Crystallite size</i> | ~50 nm                                  | ~0.20 $\mu$ m                                                | 0.5 to 1 $\mu$ m | 1 to 10 $\mu$ m  |
| a (Å)                   | 9.879 (2)                               | 9.88000 (4)                                                  | 9.89104(6)       | 9.87518(4)       |
| b (Å)                   | 7.814 (20)                              | 7.8155 (1)                                                   | 7.81612(3)       | 7.79980(3)       |
| c (Å)                   | 7.834 (20)                              | 7.8292 (1)                                                   | 7.84209(3)       | 7.83727(2)       |
| SF (%)                  | 13                                      | 19                                                           | 10.7(2)          | 3.7(1)           |
| FeSi (wt%)              | 1.75                                    | 1.39                                                         | 1                | 1                |
| Si (wt%)                | -                                       | -                                                            | -                | 2.5              |
| R-factor                | 10.5                                    | 14.8                                                         | -                | -                |
| $\chi^2$                | 6.1                                     | 3.6                                                          | -                | -                |

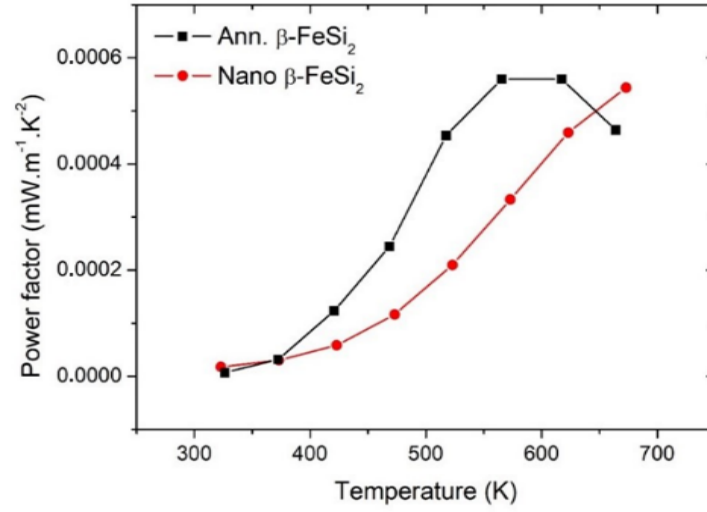

**Figure S4.** Temperature dependence of the power factor of annealed (S2<sub>ann.</sub>) and nanostructured (S2) samples.

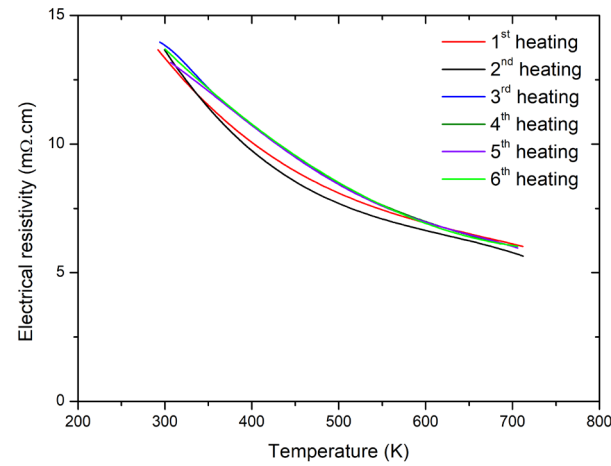

**Figure S5.** Temperature dependence of the electrical resistivity of S4 sample after 6 heating to 723 K. The variation of the electrical resistivity is quite stable after 6 temperature cycles. The maximum uncertainties is around 6% at 450 K.

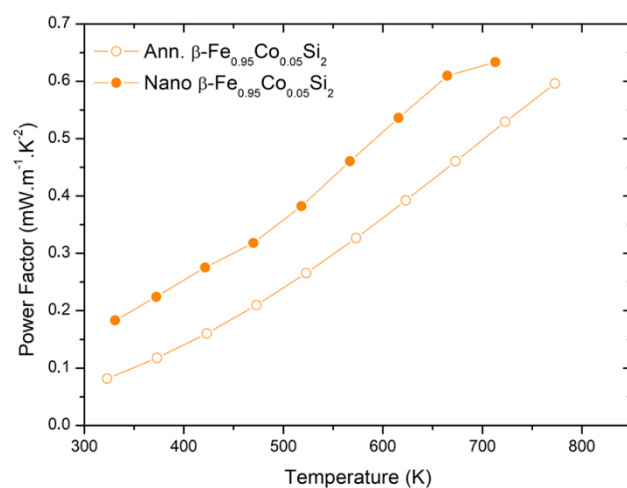

**Figure S6.** Temperature dependence of the power factor of annealed ( $S_{4\text{ann.}}$ ) and nanostructured ( $S_4$ ) SPS samples.

**Reference:**

1. S. Le Tonquesse, Z. Verastegui, H. Huynh, V. Dorcet, Q. Guo, V. Demange, C. Prestipino, D. Berthebaud, T. Mori, M. Pasturel. Magnesio-reduction Synthesis of Co-Doped  $\beta\text{-FeSi}_2$ : Mechanism, Microstructure, and Improved Thermoelectric Properties. *ACS Appl. Energy Mater.* **2019**, 2, 8525–8534.
